# Supplementary material for: Association between Circulating Antioxidants and Longevity: Insight from Mendelian Randomization Study
Source: Hindawi journal article supplement (doi:10.1155/2022/4012603), 2022-01-01

## Online Supporting Material

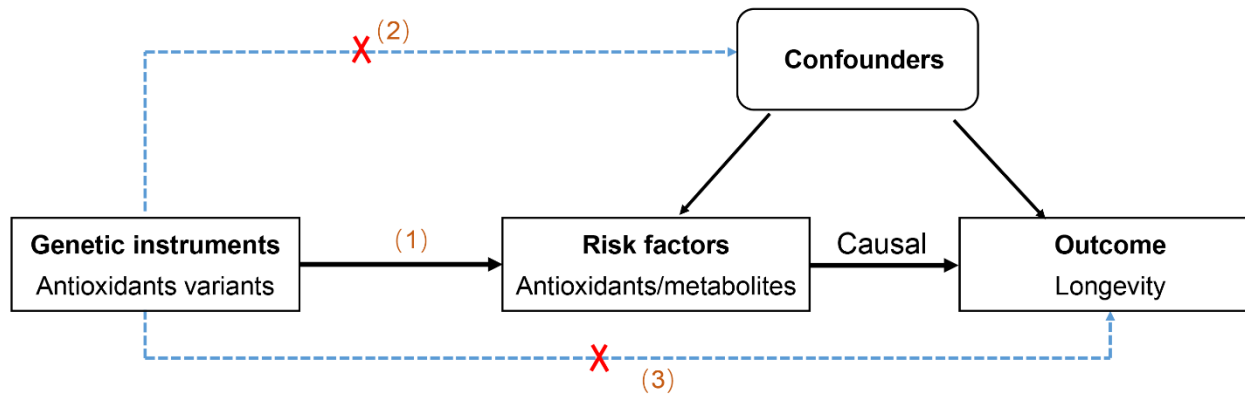

**Supplemental Figure S1:** Three principal assumptions in MR study: (1) genetic instruments are strongly related to exposure (circulating antioxidants/metabolites); (2) genetic instruments are independent of any possible known confounders; (3) genetic instrument exert impact on outcomes (longevity) entirely through the exposure (circulating antioxidants/metabolites), not through other pathways.

## Online Supporting Material

**Supplemental Figure S2:** Leave-one-out permutations for the association of absolute circulating ascorbate with longevity.

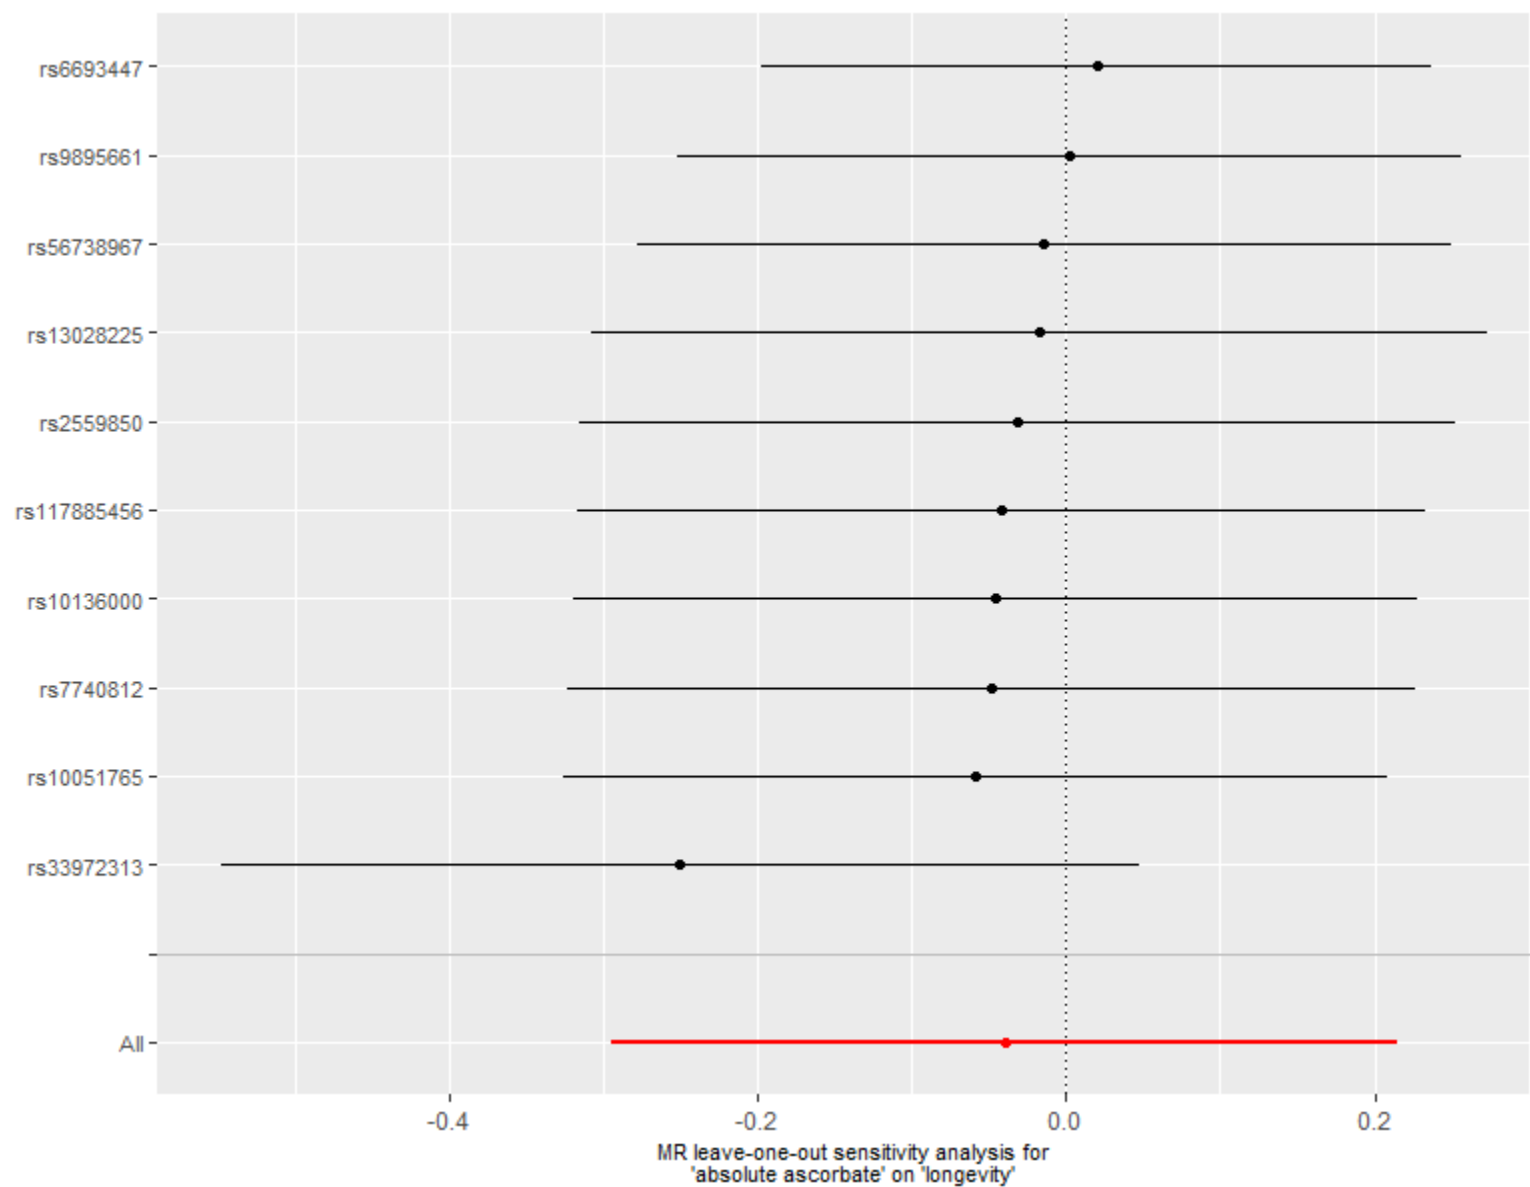

**Supplemental Figure S3:** Leave-one-out permutations for the association of absolute circulating lycopene with longevity.

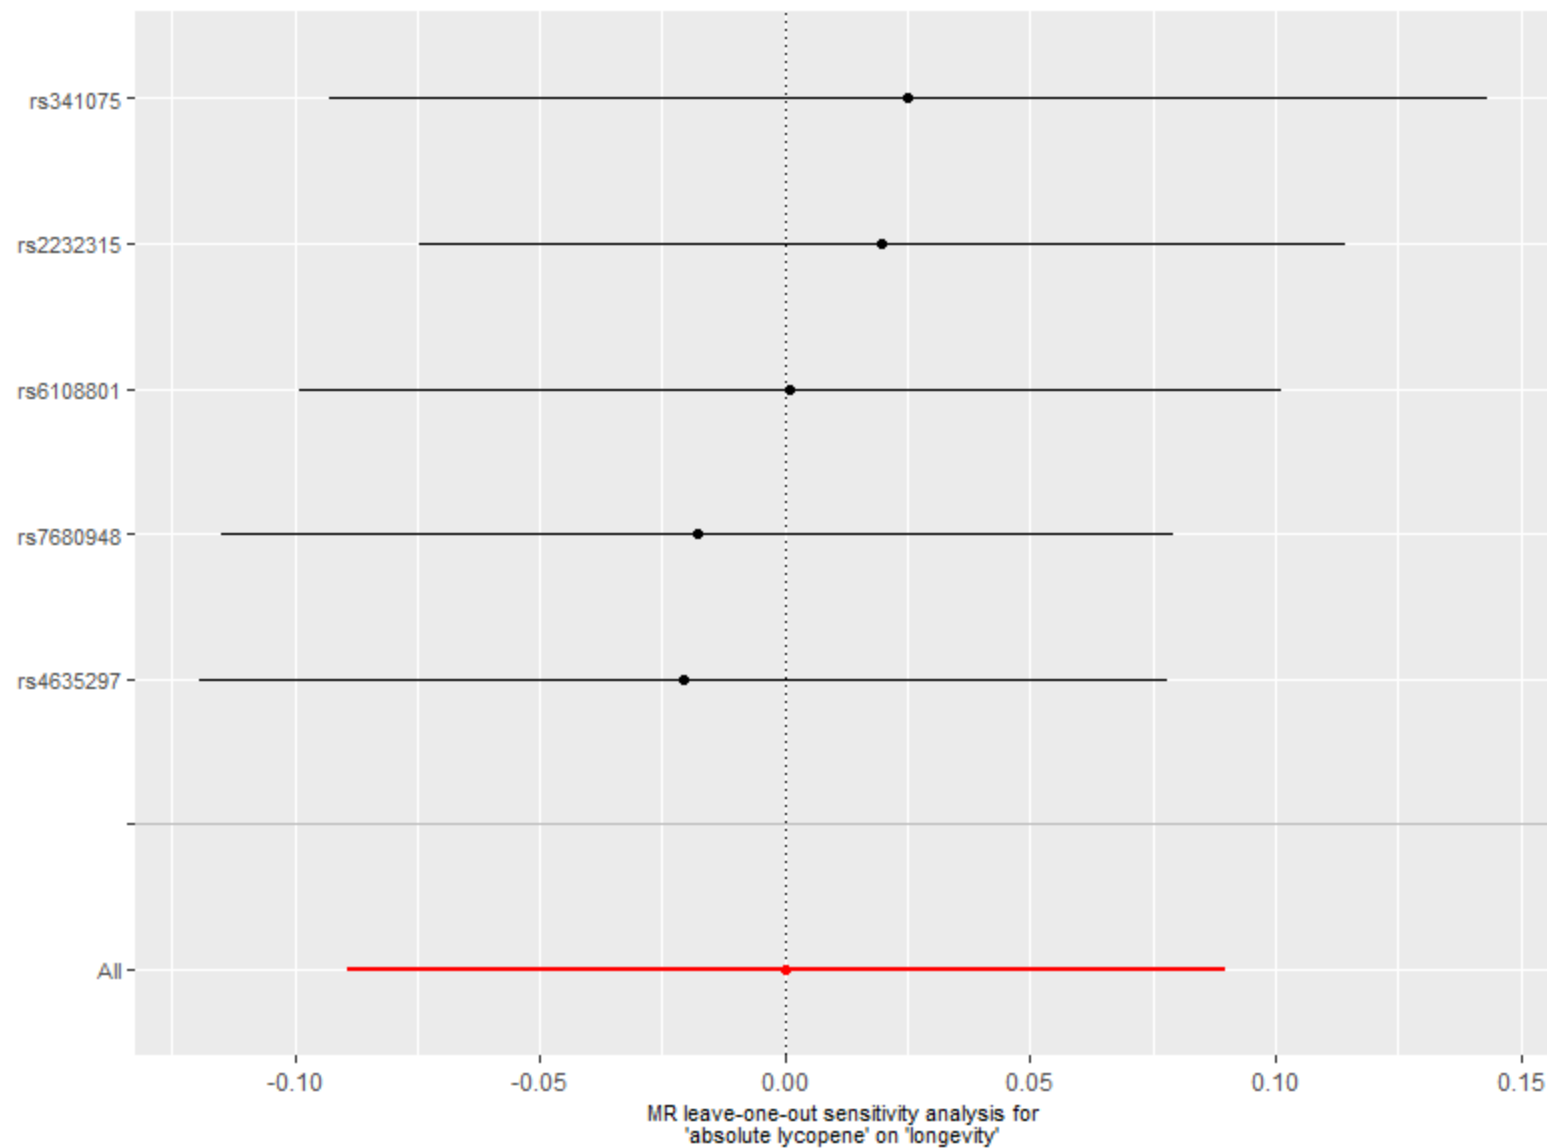

## Online Supporting Material

**Supplemental Figure S4:** Leave-one-out permutations for the association of absolute circulating selenium with longevity.

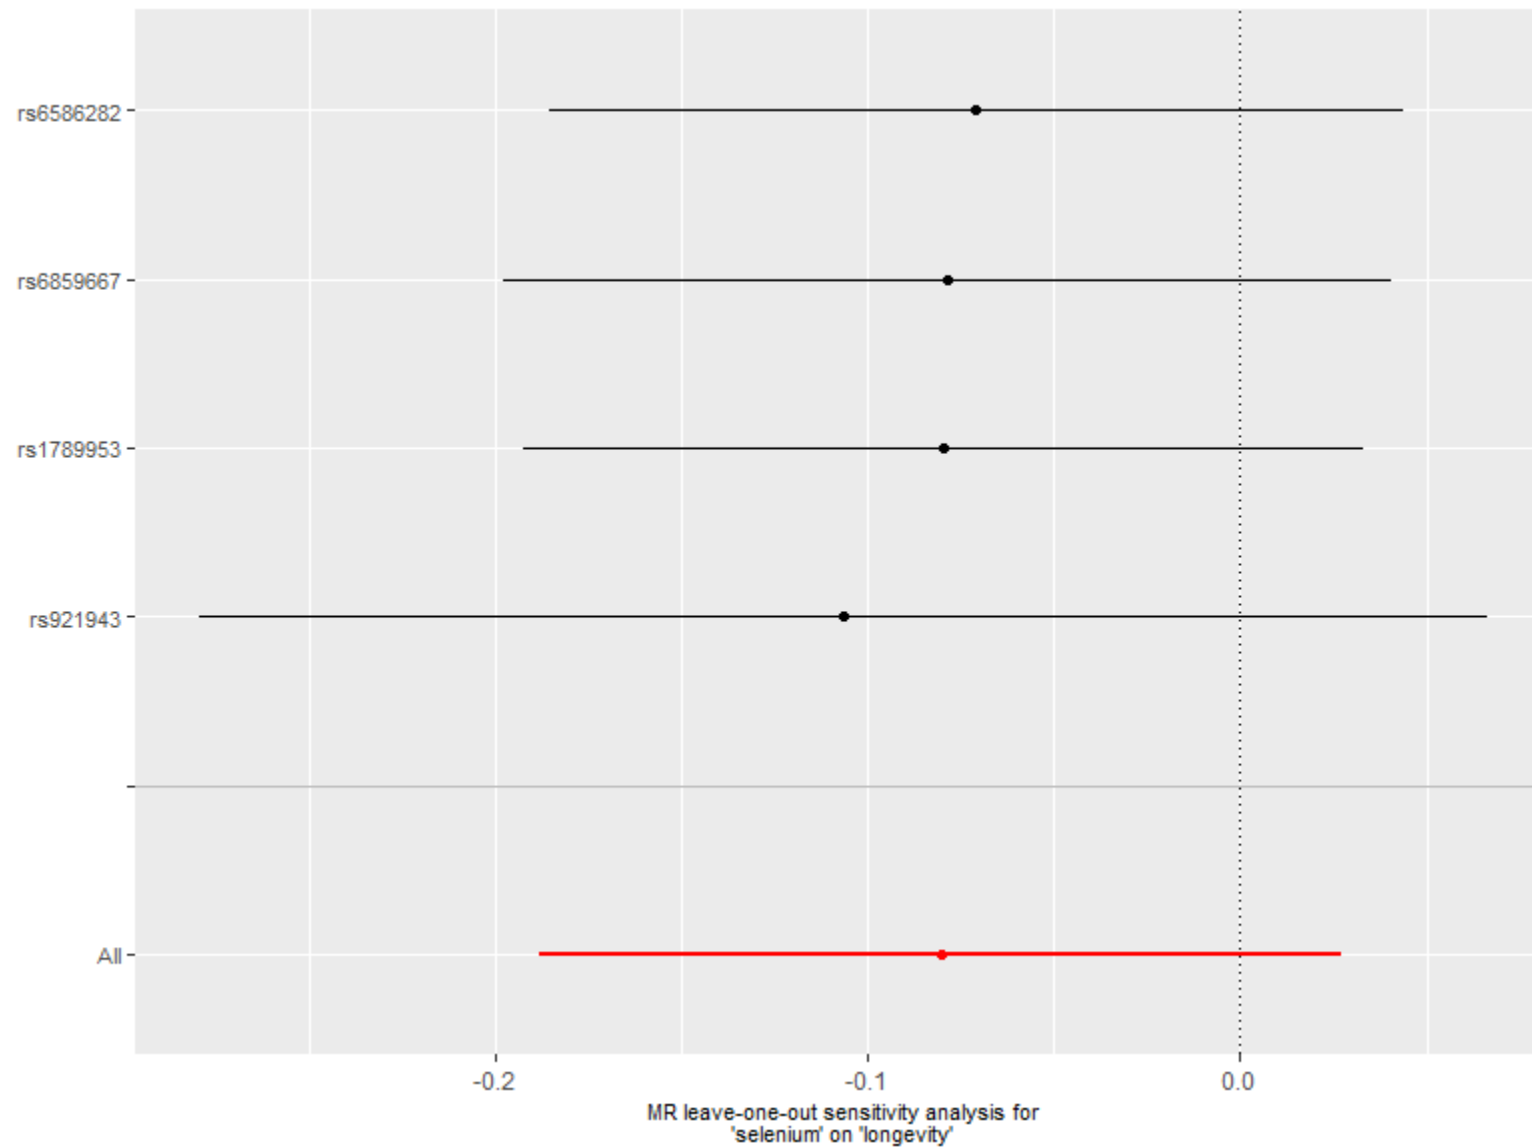

## Online Supporting Material

**Supplemental Figure S5:** Leave-one-out permutations for the association of absolute circulating beta-carotene with longevity.

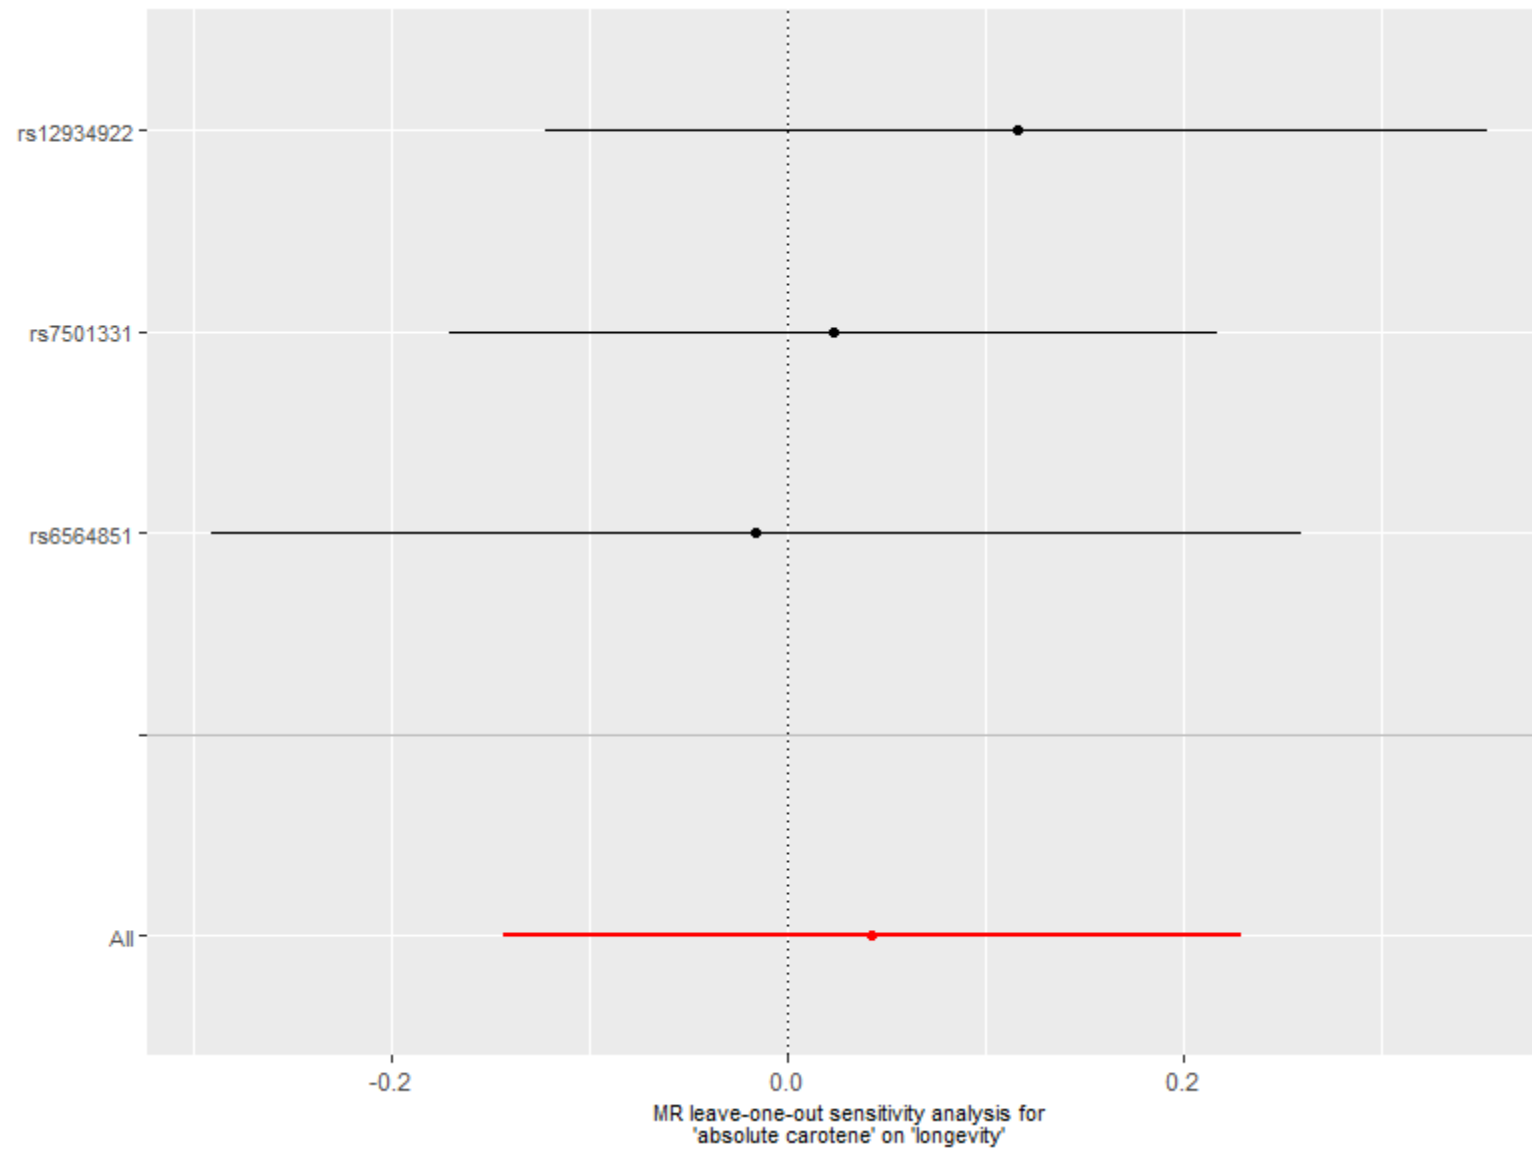

## Online Supporting Material

**Supplemental Figure S6:** Leave-one-out permutations for the association of alpha-tocopherol metabolite with longevity.

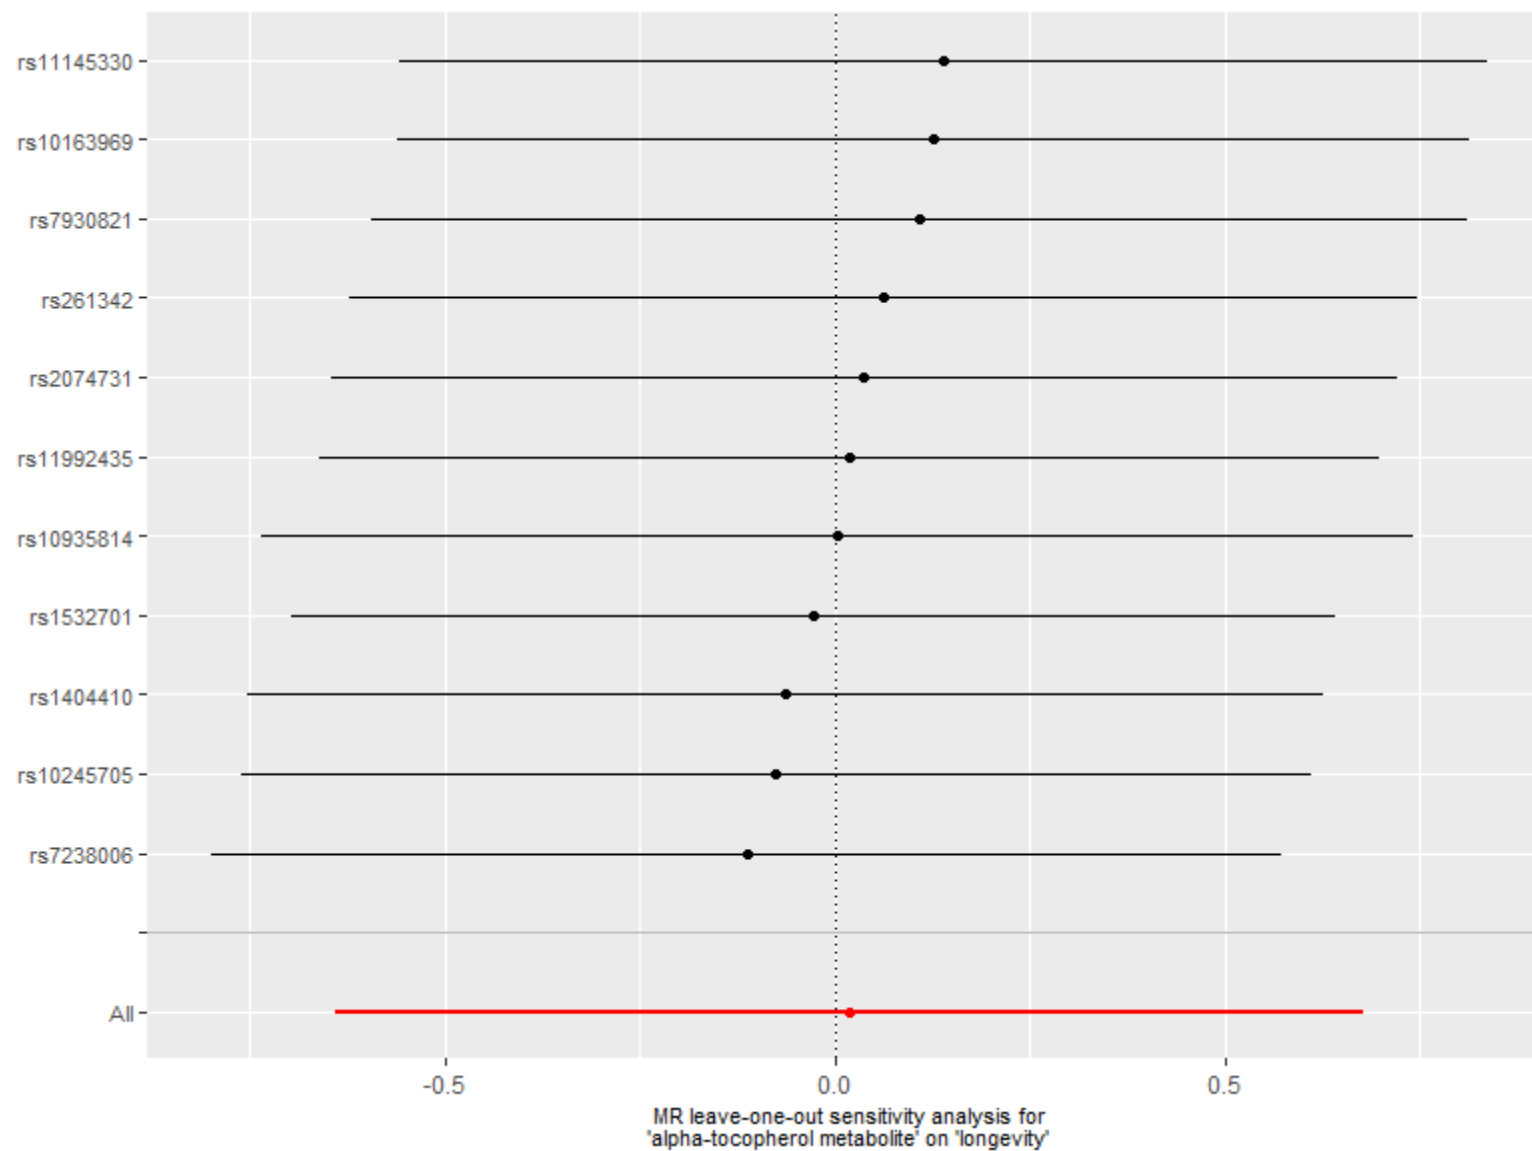

## Online Supporting Material

**Supplemental Figure S7:** Leave-one-out permutations for the association of gamma-tocopherol metabolite with longevity.

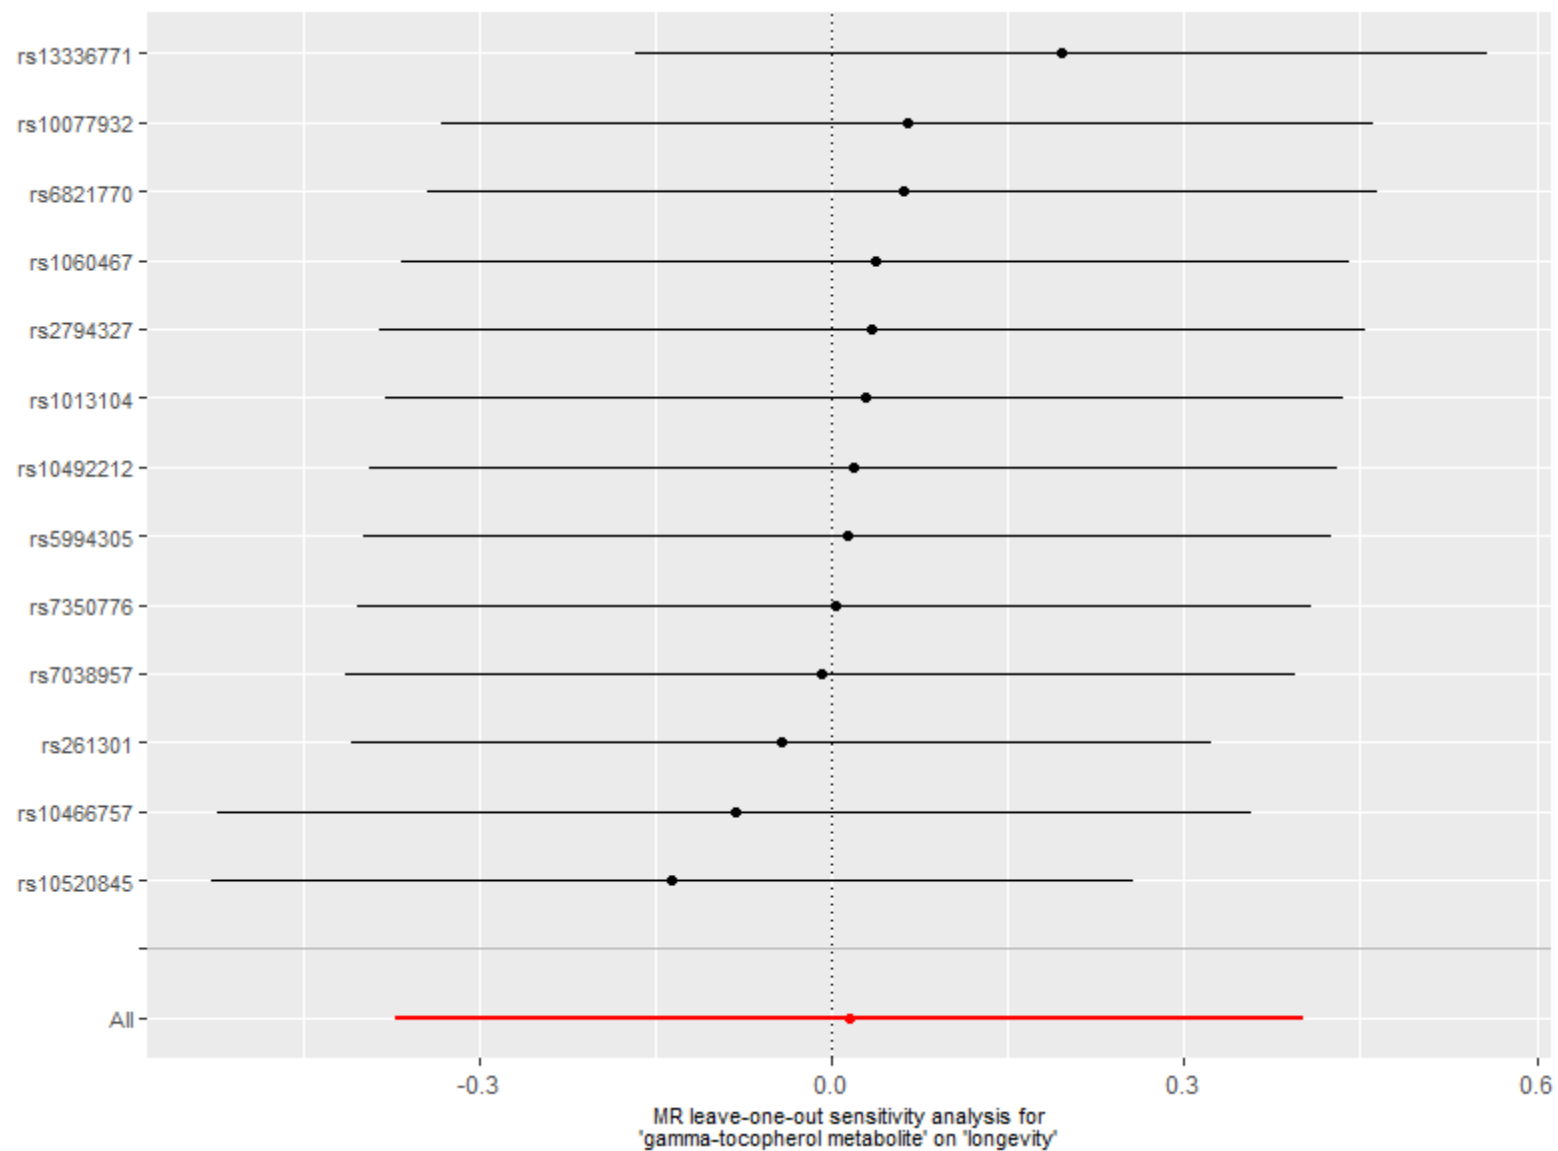

## Online Supporting Material

**Supplemental Figure S8:** Leave-one-out permutations for the association of circulating retinol metabolite with longevity.

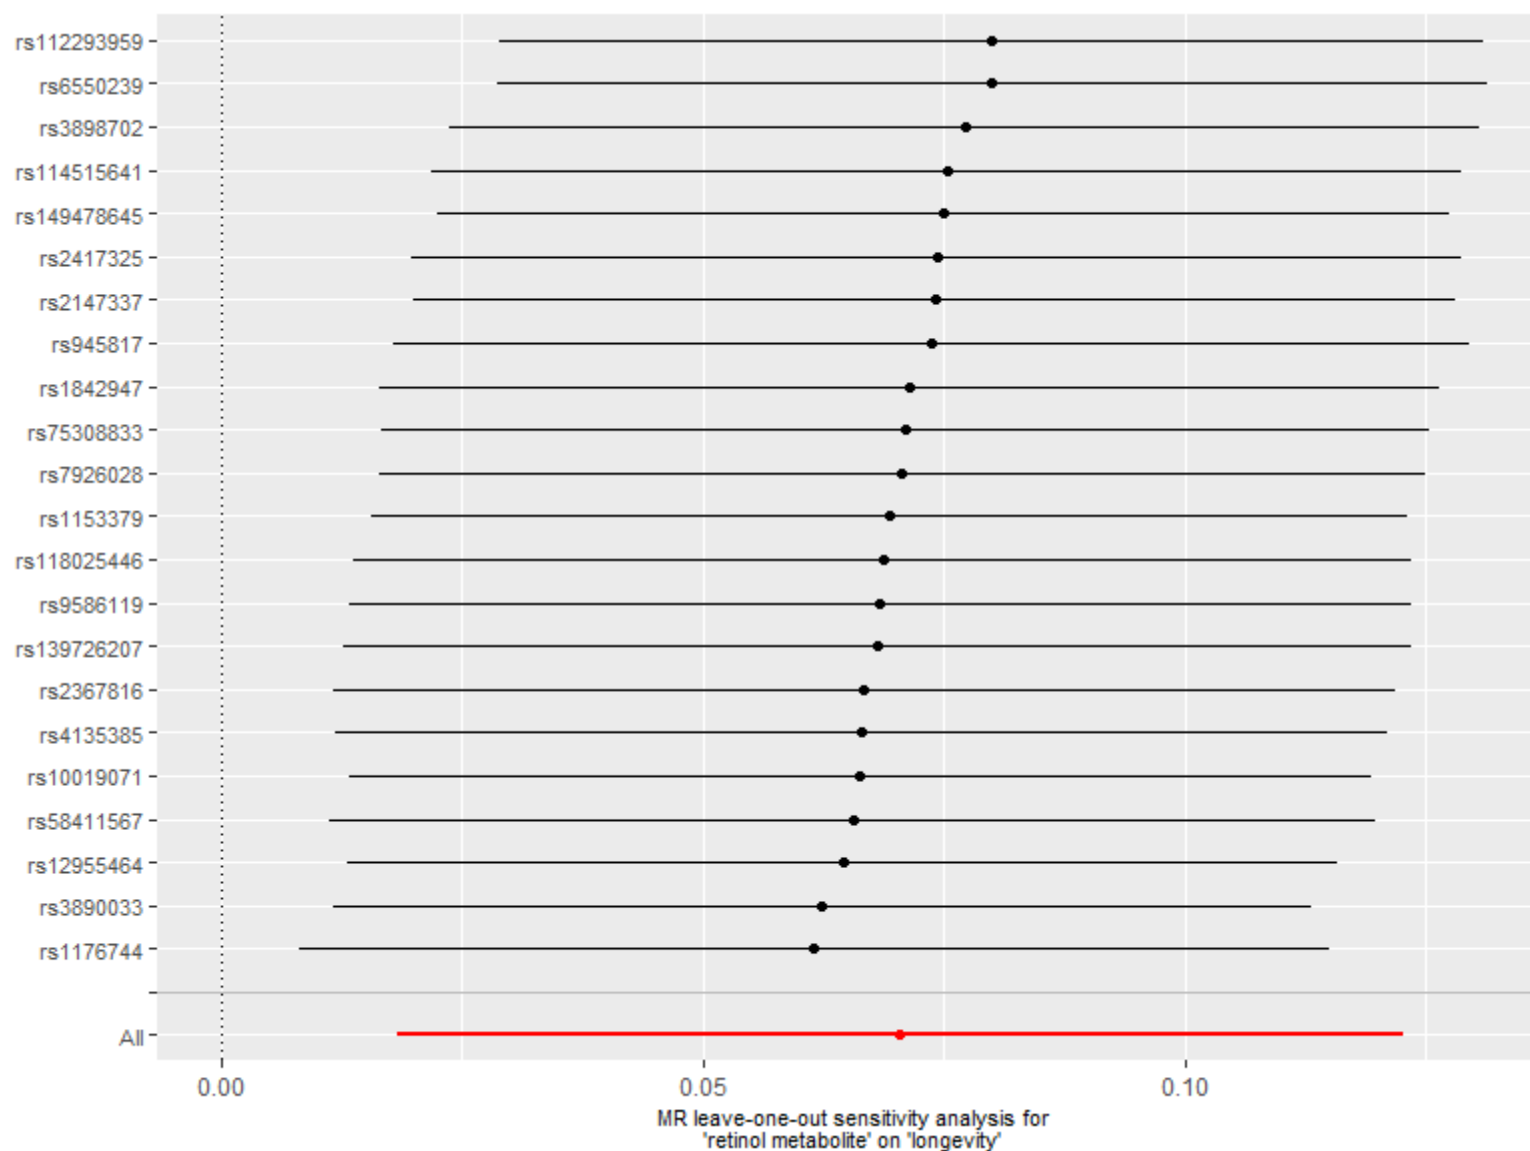



## Online Supporting Material

**Supplemental Figure S9:** Leave-one-out permutations for the association of circulating ascorbate metabolite with longevity.

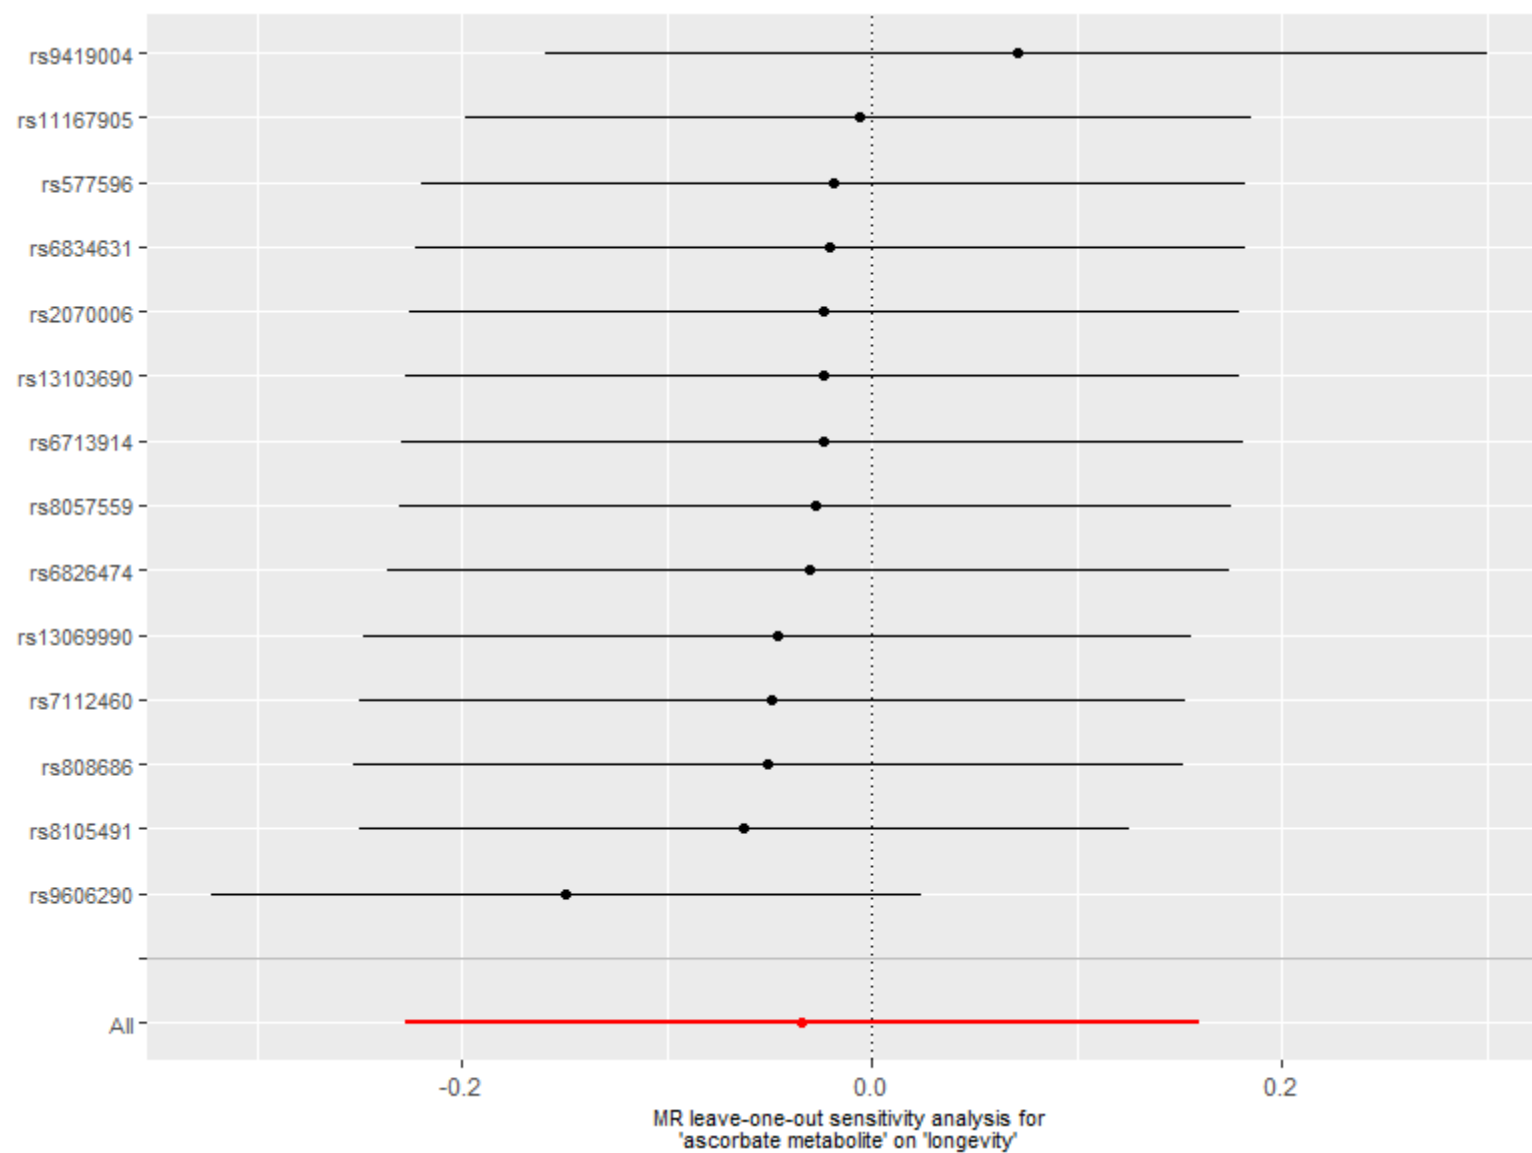

Supplement: f1 [file 4012603.f1.zip]
