# Supplementary material for: Association between Circulating Antioxidants and Longevity: Insight from Mendelian Randomization Study
Source: Hindawi journal article supplement (doi:10.1155/2022/4012603), 2022-01-01
Supplement: f1 [file 4012603.f1.zip]

## **Online Supporting Material**

### **Association Between Circulating Antioxidants and Longevity: Insight from Mendelian Randomization Study**

Zhimin Yu, Fangfang Zhang, Chengkai Xu, Yanggan Wang

## Online Supplement

## Online Supporting Material

**Supplemental Table S1:** Post-hoc power calculation for the main IVW analyses on dietary-derived circulating antioxidants and longevity.

| Antioxidant                                 | N*        | $R^2$ of exposure by genetic instruments† | Effect estimate (Beta according to IVW) | Significance level | Power§ | PMID     |
|---------------------------------------------|-----------|-------------------------------------------|-----------------------------------------|--------------------|--------|----------|
| <b>Absolute circulating antioxidants</b>    |           |                                           |                                         |                    |        |          |
| Ascorbate                                   | 1,012,240 | 0.018                                     | -0.05                                   | 0.05               | 100%   | 33203707 |
| Lycopene                                    | 1,012,240 | 0.301                                     | 0.07                                    | 0.05               | 100%   | 26861389 |
| $\beta$ -carotene                           | 1,012,240 | 0.090                                     | -0.24                                   | 0.05               | 100%   | 25343990 |
| Retinol                                     | 1,012,240 | 0.023                                     | 0.30                                    | 0.05               | 100%   | 23134893 |
| Selenium                                    | 1,012,240 | 0.059                                     | 0.00                                    | 0.05               | 11%    | 21878437 |
| <b>Circulating antioxidants metabolites</b> |           |                                           |                                         |                    |        |          |
| Ascorbate                                   | 1,012,240 | 0.186                                     | -0.03                                   | 0.05               | 100%   | 24816252 |
| $\alpha$ -tocopherol                        | 1,012,240 | 0.033                                     | 0.08                                    | 0.05               | 100%   | 24816252 |
| $\gamma$ -tocopherol                        | 1,012,240 | 0.150                                     | -0.62                                   | 0.05               | 100%   | 24816252 |
| Retinol                                     | 1,012,240 | 0.048                                     | 0.17                                    | 0.05               | 100%   | 28263315 |

\* Sample size and ratio of cases to controls according to the parental lifespan GWAS.

† The proportion of phenotypic variance explained by genetic instruments as reported in GWASs or calculated on the different circulating antioxidants.

§ Power value was calculated using an online power calculation tool (<https://sb452.shinyapps.io/power/>).

**Abbreviations:** IVW, inverse-variance weighted.

## Online Supporting Material

**Supplemental Table S2:** Cohort characteristics and exclusion criteria for the individual longevity GWAS (*90th vs. 60th percentile age dataset*).

| Cohort                                                                                                           | PMID reference                   | Ancestry | Study design     | Cases 90th percentile age |                      |          | All controls |                      |          | Exclusion criteria                                                                                                                                |
|------------------------------------------------------------------------------------------------------------------|----------------------------------|----------|------------------|---------------------------|----------------------|----------|--------------|----------------------|----------|---------------------------------------------------------------------------------------------------------------------------------------------------|
|                                                                                                                  |                                  |          |                  | N                         | Mean age (SD, years) | Male (%) | N            | Mean age (SD, years) | Male (%) |                                                                                                                                                   |
| 100-plus Study                                                                                                   | 30362018                         | European | Population-based | 293                       | 101.42 (1.69)        | 27.3     | NA           | NA                   | NA       | 1) Ethnic outliers;<br>2) Duplicates;<br>3) Related individuals                                                                                   |
| Amsterdam dementia cohort                                                                                        | 29562540                         | European | Population-based | 5                         | 95.49 (2.67)         | 80.0     | 898          | 60.07 (8.83)         | 60.65    | 1) Ethnic outliers;<br>2) Duplicates;<br>3) Related individuals                                                                                   |
| Age/Gene Environment Susceptibility Study                                                                        | 17351290                         | European | Population-based | 300                       | 95.03 (2.45)         | 59.0     | 1001         | 81.32 (3.30)         | 12.30    | 1) Gender mismatch;<br>2) Mismatch previous genotypes                                                                                             |
| CEPH centenarian cohort (controls from Supplementation in Vitamins and Mineral Antioxidants study)               | 11280044                         | European | Population-based | 1234                      | 102.35 (3.03)        | 18.6     | 831          | 56.1 (6.2)           | 40.80    | 1) Ethnic outliers;<br>2) Heterozygosity;<br>3) Gender mismatches;<br>4) Duplicates;<br>5) Related individuals                                    |
| Cardiovascular Health Study                                                                                      | 1669507                          | European | Population-based | 905                       | 94.0 (3.28)          | 61.1     | 558          | 77.76 (3.93)         | 14.20    | 1) Gender mismatches                                                                                                                              |
| Danish longevity study (controls from Genomics of extremely Overweight Young Adults study)                       | 28449061<br>12184889<br>21935397 | European | Population-based | 960                       | 100.17 (2.90)        | 25.4     | 1917         | 26.52 (5.54)         | 27.96    | 1) Ethnic outliers;<br>2) Heterozygosity;<br>3) Gender mismatches;<br>4) Duplicates;<br>5) Related individuals;<br>6) Mismatch previous genotypes |
| Framingham Heart Study                                                                                           | 17372189                         | European | Population-based | 332                       | 94.44 (3.42)         | 55.1     | 1444         | 75.95 (5.11)         | 39.63    | 1) Ethnic outliers;<br>2) Heterozygosity;<br>3) Mendelian errors                                                                                  |
| GEnetics of Healthy Aging (Danish subsample) (controls from Genomics of extremely Overweight Young Adults study) | 21871552                         | European | Family-based     | 451                       | 97.76 (2.88)         | 32.2     | 900          | 26.56 (5.54)         | 28.89    | 1) Ethnic outliers;<br>2) Heterozygosity;<br>3) Gender mismatches;<br>4) Duplicates;<br>5) Related individuals;<br>6) Mismatch previous genotypes |
| GEnetics of Healthy Aging (Dutch subsample)                                                                      | 21871552                         | European | Family-based     | 182                       | 98.77 (2.97)         | 35.7     | NA           | NA                   | NA       | 1) Gender mismatches                                                                                                                              |
| GEnetics of Healthy Aging                                                                                        | 21871552                         | European | Family-based     | 271                       | 98.88 (3.03)         | 31.0     | 358          | 63.4 (6.8)           | 35.00    | 1) Gender mismatches                                                                                                                              |

## Online Supporting Material

|                                                                                             |                      |          |                  |      |              |       |      |                  |        |                                                                                                                |
|---------------------------------------------------------------------------------------------|----------------------|----------|------------------|------|--------------|-------|------|------------------|--------|----------------------------------------------------------------------------------------------------------------|
| (French subsample)                                                                          |                      |          |                  |      |              |       |      |                  |        |                                                                                                                |
| GENetics of Healthy Aging<br>(Italian subsample)                                            | 21871552             | European | Family-based     | 182  | 98.96 (2.68) | 27.5  | 184  | 62.6 (6.0)       | 27.70  | 1) Gender mismatches                                                                                           |
| Health and Retirement Study                                                                 | 24671021             | European | Population-based | 361  | 93.8 (3.0)   | 59.6  | 3312 | 77.3 (3.7)       | 34.50  | 1) Ethnic outliers;<br>2) Heterozygosity;<br>3) Gender mismatches;<br>4) Duplicates;<br>5) Related individuals |
| Longitudinal aging study of<br>Amsterdam                                                    | 21216744             | European | Population-based | 75   | 94.16 (3.67) | 57.3  | 1373 | 69.85 (6.97)     | 45.96  | 1) Ethnic outliers;<br>2) Duplicates;<br>3) Related individuals                                                |
| Long Life Family Study                                                                      | 21258136             | European | Family-based     | 1110 | 97.7 (3.81)  | 53.0  | 552  | 77.4 (3.14)      | 38.20  | 1) Ethnic outliers;<br>2) Heterozygosity;<br>3) Gender mismatches                                              |
| Leiden Longevity Study                                                                      | 16251894<br>19682117 | European | Family-based     | 855  | 97.73 (3.47) | 40.7  | 712  | 67.62 (7.03)     | 40.70  | 1) Gender mismatches;<br>2) Family mismatches                                                                  |
| Longevity Gene Project                                                                      | 16602826<br>24522433 | European | Population-based | 548  | 96.3 (4.7)   | 32.0  | 584  | 68.2 (5.8)       | 35.50  | 1) Gender mismatches;<br>2) Family mismatches                                                                  |
| Osteoporotic Fractures in<br>Men Study                                                      | 16085466<br>16084776 | European | Population-based | 1171 | 93.0 (2.8)   | 100.0 | 386  | 75.1 (2.9)       | 100.00 | 1) Ethnic outliers;<br>2) Gender mismatches;<br>3) Related individuals                                         |
| Newcastle 85+ Study<br>(controls from Wellcome<br>Trust Case Control<br>Consortium 2 study) | 20028777             | European | Population-based | 215  | 93.28 (1.36) | 62.3  | 5159 | 20.07<br>(22.47) | 50.53  | 1) Ethnic outliers;<br>2) Heterozygosity;<br>3) Gender mismatches;<br>4) Duplicates;<br>5) Related individuals |
| Rotterdam study                                                                             | 21877163             | European | Population-based | 774  | 94.96 (3.34) | 42.9  | 2965 | 78.22 (5.31)     | 33.22  | 1) Ethnic outliers;<br>2) Heterozygosity;<br>3) Gender mismatches;<br>4) Duplicates;<br>5) Related individuals |
| Study of Osteoporotic<br>Fracture                                                           | 2404146              | European | Population-based | 812  | 96.44 (2.17) | 0.0   | 354  | 80.67 (2.24)     | 0.00   | 1) Ethnic outliers;<br>2) Gender mismatches;<br>3) Related individuals                                         |
| Vitality 90+ project (controls<br>from Cardiovascular Risk in<br>Young Finns Study)         | 16137286             | European | Population-based | 226  | 92.93 (1.13) | 26.1  | 1995 | 41.89 (4.98)     | 44.30  | 1) Heterozygosity;<br>2) Gender mismatches;<br>3) Related individuals                                          |

## Online Supporting Material

**Supplemental Table S3:** Cohort characteristics and exclusion criteria for the parental lifespan GWAS.

| Cohort                                                       | PMID reference                 | Ancestry          | Study design                     | N       | No. of Father | No. of Mother | Mean age (years) | Exclusion criteria                                                                                                                                                         |
|--------------------------------------------------------------|--------------------------------|-------------------|----------------------------------|---------|---------------|---------------|------------------|----------------------------------------------------------------------------------------------------------------------------------------------------------------------------|
| <b>UK Biobank</b>                                            | 25826379                       | European          | Population-based                 | 691,621 | 339,732       | 351,889       | 74.8             | Adopted or unclear about adoption status; not report parental ages; both parents died before age of 40; one of each pair from related individuals (third degree or closer) |
| <b>LifeGen cohort</b>                                        |                                |                   |                                  |         |               |               |                  |                                                                                                                                                                            |
| Age and Cognitive Performance Research Centre (ACPRC)        | DOI: 10.1080/13825580490511116 | European          | Population-based                 | 2,873   | 1,421         | 1,452         | 73.5             | Ethnic outliers; duplicates; Gender mismatch; IBS incompatible with pedigree                                                                                               |
| Atherosclerosis Risk in Communities Study (ARIC_EA)          | 2646917                        | European          | Population-based                 | 16,890  | 8,342         | 8,548         | 73.0             | -                                                                                                                                                                          |
| Austrian Stroke Prevention Family Study (ASPS-Fam)           | 25443291, 25309438             | European          | Population-based                 | 295     | 144           | 151           | 76.1             | Ethnic outliers; duplicates; Gender mismatch; cryptic relatedness                                                                                                          |
| BASE-II (BASE-II)                                            | promised                       | -                 | -                                | 2,611   | 1,163         | 1,448         | 77.2             | -                                                                                                                                                                          |
| Cardiovascular Health Study (CHS_EA)                         | 1669507                        | European          | Population-based                 | 5,609   | 2,818         | 2,791         | 75.2             | Baseline CHD, CHF, peripheral vascular disease, valvular heart disease, stroke, or TIA; non-EA; discordant with known sex or prior genotyping, lack of consent             |
| Cilento Study (CILENTO)                                      | 17476112 19550436              | European          | Cross-sectional population based | 1,247   | 625           | 622           | 77.2             | Ethnic outliers; gender mismatch; IBS incompatible with pedigree                                                                                                           |
| Cohorte Lausannois (CoLaus)                                  | 18366642                       | European          | Population-based                 | 10,104  | 5,051         | 5,053         | 73.8             | none                                                                                                                                                                       |
| Estonian Genome Centre University of Tartu (EGCUT ExomeCore) | 24518929                       | European          | Population-based                 | 7,719   | 3,692         | 4,027         | 60.8             | Ethnic outliers; duplicates; Gender mismatch; IBS incompatible with pedigree                                                                                               |
| Estonian Genome Centre University of Tartu (EGCUT omni)      | 19424496                       | European          | Population-based                 | 10,530  | 5,030         | 5,500         | 67.5             | Ethnic outliers; duplicates; gender mismatch; IBS incompatible with pedigree                                                                                               |
| Erasmus Rucphen Family Study (ERF)                           | 15845033                       | European          | Family-based                     | 1,931   | 956           | 975           | 71.5             | Ethnic outliers; duplicates; gender mismatch; IBS incompatible with pedigree                                                                                               |
| Genetic Study of Atherosclerosis Risk (GeneSTAR_EA)          | 17950799                       | European American | Family-based                     | 2,073   | 1,028         | 1,045         | 69.8             | ethnic outliers; gender mismatch; >5% Mendelian inconsistencies                                                                                                            |

## Online Supporting Material

|                                                                   |                               |          |                                                                        |         |        |        |      |                                                                                                                                  |
|-------------------------------------------------------------------|-------------------------------|----------|------------------------------------------------------------------------|---------|--------|--------|------|----------------------------------------------------------------------------------------------------------------------------------|
| Generation Scotland: Scottish Family Health Study (GS:SFHS)       | 22786799 (GS10K)              | European | Family-based                                                           | -       | -      | -      | -    | Ethnic/PCs Outliers; duplicates                                                                                                  |
| ipsych (iPSYCH)                                                   | -                             | European | Population based                                                       | 119,265 | 61,224 | 58,041 | 51.4 | Duplicates, gender mismatch                                                                                                      |
| Micro-isolates in South Tyrol (MICROS)                            | -                             | European | Population-based                                                       | 1,601   | 782    | 819    | 70.1 | Ethnic outliers; duplicates; gender mismatch; IBS incompatible with pedigree                                                     |
| MRC National Survey of Health and Development (NSHD)              | 16204333, 21345808 , 23977022 | European | Prospective birth cohort                                               | 4,424   | 2,199  | 2,225  | 74.1 | Sex mismatch                                                                                                                     |
| Nijmegen Biomedical Study (NBS)                                   | 28082374                      | European | Population based                                                       | 8,695   | 4,352  | 4,343  | 74.1 | Ethnic outliers; duplicates; gender mismatch; relatedness PL_HAT>0.25                                                            |
| Netherlands Twin Registry (NTR)                                   | -                             | European | Twin Families - Population-based                                       | 8,892   | 4372   | 4520   | 68.4 | Ethnic outliers, gender mismatch, IBS incompatible with pedigree, duplicates, >5sd Mendelian errors, CQC < 0.40, callrate > 0.90 |
| Ogliastra Genetic Park (OGP)                                      | 20004756                      | European | Population-based                                                       | 1,266   | 636    | 630    | 72.7 | Ethnic outliers; duplicates; gender mismatch; IBS incompatible with pedigree                                                     |
| Orkney Complex Disease Study (ORCADES HAP300)                     | 18760389                      | European | Population-based                                                       | 996     | 488    | 508    | 72.7 | Ethnic outliers; duplicates; gender mismatch; IBS incompatible with pedigree                                                     |
| Prospective Study of Pravastatin in the Elderly at Risk (PROSPER) | 10569329; 12457784; 21977987  | European | RCT/Population-based                                                   | 9,832   | 4915   | 4917   | 74.1 | Ethnic outliers; duplicates; gender mismatch; IBS incompatible with pedigree                                                     |
| Queensland Institute of Medical Research (QIMR Berghofer)         | -                             | European | Population-based (largely twin families from Australian Twin Registry) | 8,774   | 4367   | 4407   | 69.8 | Ethnic outliers; gender mismatch; IBD checks against expected and deduced pedigrees                                              |
| Rotterdam Study (RS1)                                             | 26386597                      | European | Population-based                                                       | 10,745  | 5,342  | 5403   | 75.4 | Ethnic outliers; duplicates; gender mismatch                                                                                     |
| Rotterdam Study (RS2)                                             | 26386597                      | European | Population-based                                                       | 3,373   | 1659   | 1714   | 76.3 | Ethnic outliers; duplicates; gender mismatch                                                                                     |
| Shetland Complex Disease Study (VIKING)                           | -                             | European | Population-based                                                       | 1,226   | 610    | 616    | 71.6 | Outliers; duplicates                                                                                                             |
| Vitality90 (Vitality90)                                           | 16137286<br>26436701          | European | Population-based, nonagenarians                                        | 444     | 215    | 229    | 71.8 | Gender mismatch (n=1), Cryptic relatedness (n=0), MDS outliers removed (n=13)                                                    |

## Online Supporting Material

|                                    |           |          |                  |        |       |       |      |                                                                                                                      |
|------------------------------------|-----------|----------|------------------|--------|-------|-------|------|----------------------------------------------------------------------------------------------------------------------|
| Women's Genome Health Study (WGHS) | 18070814? | European | Population based | 35,401 | 17308 | 18093 | 77.8 | Multidimensional scaling in PLINK using 1443 ancestry informative markers to verify self-reported European ancestry. |
|------------------------------------|-----------|----------|------------------|--------|-------|-------|------|----------------------------------------------------------------------------------------------------------------------|

**Supplemental Table S4:** Effect estimates for the associations of the selected instrumental variants with absolute circulating antioxidants and longevity across two datasets.

| SNP             | Antioxidant | Chr | Pos       | Nearest Gene    | EA | OA | EAF   | F statistic | Exposure |       |          | Longevity outcomes           |        |         |                   |        |         |
|-----------------|-------------|-----|-----------|-----------------|----|----|-------|-------------|----------|-------|----------|------------------------------|--------|---------|-------------------|--------|---------|
|                 |             |     |           |                 |    |    |       |             |          |       |          | 90th vs. 60th percentile age |        |         | Parental lifespan |        |         |
|                 |             |     |           |                 |    |    |       |             | Beta     | SE    | P-value  | Beta                         | SE     | P-value | Beta              | SE     | P-value |
| rs33972313      | ascorbate   | 5   | 138715502 | <i>SLC23A1</i>  | C  | T  | 0.960 | 122.10      | 0.360    | 0.018 | 4.61E-90 | 0.075                        | 0.057  | 0.19    | 0.003             | 0.0107 | 0.78    |
| rs10051765      | ascorbate   | 5   | 176799992 | <i>RGS14</i>    | C  | T  | 0.342 | 10.33       | 0.039    | 0.007 | 3.64E-09 | 0.017                        | 0.0221 | 0.43    | 0.002             | 0.004  | 0.71    |
| rs10136000      | ascorbate   | 14  | 105253581 | <i>AKT1</i>     | A  | G  | 0.283 | 10.80       | 0.040    | 0.007 | 1.33E-08 | 0.006                        | 0.025  | 0.80    | -0.002            | 0.004  | 0.62    |
| rs11788545<br>6 | ascorbate   | 12  | 96249111  | <i>SNRPF</i>    | A  | G  | 0.087 | 14.59       | 0.078    | 0.012 | 1.70E-11 | 9.00E-04                     | 0.045  | 0.98    | -0.013            | 0.007  | 0.07    |
| rs13028225      | ascorbate   | 2   | 220031255 | <i>SLC23A3</i>  | T  | C  | 0.857 | 38.57       | 0.102    | 0.009 | 2.38E-30 | -0.016                       | 0.029  | 0.55    | 0.006             | 0.006  | 0.31    |
| rs2559850       | ascorbate   | 12  | 102093459 | <i>CHPT1</i>    | A  | G  | 0.598 | 24.44       | 0.058    | 0.006 | 6.30E-20 | -0.007                       | 0.020  | 0.73    | 0.001             | 0.004  | 0.79    |
| rs56738967      | ascorbate   | 16  | 79740541  | <i>MAF</i>      | C  | G  | 0.321 | 11.06       | 0.041    | 0.007 | 7.62E-10 | -0.023                       | 0.021  | 0.25    | 0.003             | 0.004  | 0.42    |
| rs6693447       | ascorbate   | 1   | 2330190   | <i>RER1</i>     | T  | G  | 0.551 | 11.36       | 0.039    | 0.006 | 6.25E-10 | -0.050                       | 0.020  | 0.01    | -0.009            | 0.004  | 0.02    |
| rs7740812       | ascorbate   | 6   | 52725787  | <i>GSTA5</i>    | G  | A  | 0.594 | 10.51       | 0.038    | 0.006 | 1.88E-09 | 0.005                        | 0.020  | 0.77    | -0.001            | 0.004  | 0.79    |
| rs12934922      | β-carotene  | 16  | 81301694  | <i>BCMO1</i>    | T  | A  | 0.44  | 60.21       | 0.139    | 0.020 | 5.90E-10 | -0.010                       | 0.021  | 0.63    | 0.002             | 0.004  | 0.60    |
| rs6564851       | β-carotene  | 16  | 81264597  | <i>BCMO1</i>    | G  | T  | 0.36  | 98.67       | 0.149    | 0.020 | 1.60E-24 | 0.014                        | 0.019  | 0.48    | 0.006             | 0.004  | 0.15    |
| rs7501331       | β-carotene  | 16  | 81314496  | <i>BCMO1</i>    | T  | C  | 0.24  | 17.69       | -0.067   | 0.020 | 1.60E-05 | -0.019                       | 0.023  | 0.42    | -0.005            | 0.005  | 0.29    |
| rs2232315       | lycopene    | 2   | 169757432 | <i>G6PC2</i>    | A  | G  | 0.03  | 25.01       | 0.740    | 0.150 | 1.26E-06 | -0.126                       | 0.105  | 0.23    | -0.015            | 0.015  | 0.34    |
| rs341075        | lycopene    | 11  | 72257963  | –               | A  | G  | 0.02  | 24.91       | -0.870   | 0.170 | 5.75E-07 | 0.029                        | 0.061  | 0.63    | -0.014            | 0.012  | 0.22    |
| rs4635297       | lycopene    | 15  | 38327408  | <i>BC039545</i> | A  | C  | 0.08  | 25.97       | 0.260    | 0.050 | 6.46E-07 | 0.025                        | 0.028  | 0.37    | -0.005            | 0.005  | 0.30    |
| rs6108801       | lycopene    | 20  | 10989519  | –               | C  | T  | 0.04  | 27.32       | -0.480   | 0.090 | 4.07E-07 | 0.002                        | 0.058  | 0.97    | -0.004            | 0.011  | 0.70    |

## Online Supporting Material

|            |          |    |           |                                    |   |   |      |        |        |       |          |        |       |      |        |       |      |
|------------|----------|----|-----------|------------------------------------|---|---|------|--------|--------|-------|----------|--------|-------|------|--------|-------|------|
| rs7680948  | lycopene | 4  | 140447105 | <i>SETD7</i>                       | A | C | 0.20 | 38.52  | -0.190 | 0.030 | 4.97E-09 | -0.020 | 0.022 | 0.39 | -0.009 | 0.004 | 0.03 |
| rs10882272 | retinol  | 10 | 95348182  | <i>RBP4</i>                        | C | T | 0.35 | 34.57  | -0.030 | 0.010 | 7.00E-15 | 0.006  | 0.020 | 0.77 | -0.003 | 0.004 | 0.50 |
| rs1667255  | retinol  | 18 | 29187279  | <i>TTR</i>                         | C | A | 0.31 | 34.57  | 0.030  | 0.010 | 6.00E-14 | -0.037 | 0.020 | 0.06 | -0.003 | 0.004 | 0.51 |
| rs1789953  | selenium | 21 | 44482936  | <i>CBS, PKNOX1, U2AF1, WDR4</i>    | T | C | 0.14 | 30.47  | 0.162  | 0.029 | 3.40E-08 | -0.014 | 0.030 | 0.64 | 0.005  | 0.006 | 0.36 |
| rs6586282  | selenium | 21 | 44478497  | <i>CBS, PKNOX1, U2AF1, STAG3OS</i> | T | C | 0.17 | 34.69  | -0.160 | 0.027 | 3.96E-09 | 0.024  | 0.026 | 0.35 | 0.011  | 0.005 | 0.02 |
| rs6859667  | selenium | 5  | 78745042  | <i>HOMER1, JMY</i>                 | T | C | 0.96 | 47.89  | -0.360 | 0.052 | 4.40E-12 | 0.032  | 0.046 | 0.50 | 0.010  | 0.010 | 0.33 |
| rs921943   | selenium | 5  | 78316476  | <i>DMGDH, ARSB, B HMT2</i>         | T | C | 0.29 | 172.66 | 0.295  | 0.022 | 1.90E-39 | -0.019 | 0.021 | 0.36 | -0.007 | 0.004 | 0.13 |

**Abbreviations:** Chr, Chromosome; EA, effect allele; EAF, effect allele frequency; OA, other allele; NA, not available; Pos, position; SE, standard error; SNP, single nucleotide polymorphism.

The unit of beta coefficients is log-odds per allele.



## Online Supporting Material

**Supplemental Table S5:** Effect estimates for the associations of the selected instrumental variants with circulating antioxidant metabolites and longevity across two datasets.

| SNP        | Antioxidant      | Chr | Pos       | Nearest Gene         | EA | OA | EAF  | F statistic | Exposure |       |          | Longevity outcomes           |       |         |                   |       |         |
|------------|------------------|-----|-----------|----------------------|----|----|------|-------------|----------|-------|----------|------------------------------|-------|---------|-------------------|-------|---------|
|            |                  |     |           |                      |    |    |      |             |          |       |          | 90th vs. 60th percentile age |       |         | Parental lifespan |       |         |
|            |                  |     |           |                      |    |    |      |             | Beta     | SE    | P-value  | Beta                         | SE    | P-value | Beta              | SE    | P-value |
| rs10163969 | alpha-tocopherol | 18  | 9067439   | <i>NDUFV2</i>        | T  | G  | 0.04 | 19.36       | -0.040   | 0.010 | 9.39E-06 | 0.048                        | 0.047 | 0.31    | NA                | NA    | NA      |
| rs10245705 | alpha-tocopherol | 7   | 26129672  | <i>AC004520.1</i>    | T  | C  | 0.02 | 27.25       | -0.070   | 0.010 | 1.95E-07 | -0.081                       | 0.085 | 0.34    | -0.005            | 0.015 | 0.73    |
| rs10935814 | alpha-tocopherol | 3   | 150352873 | <i>SELENOT</i>       | A  | G  | 0.10 | 19.87       | -0.040   | 0.010 | 9.44E-06 | -0.003                       | 0.030 | 0.91    | -0.004            | 0.006 | 0.53    |
| rs11145330 | alpha-tocopherol | 9   | 71733603  | <i>TJP2</i>          | A  | C  | 0.89 | 22.70       | 0.030    | 0.010 | 1.95E-06 | -0.029                       | 0.031 | 0.34    | 0.003             | 0.006 | 0.57    |
| rs11992435 | alpha-tocopherol | 8   | 81526083  | <i>RN7SL107P</i>     | A  | G  | 0.95 | 20.63       | 0.030    | 0.010 | 6.38E-06 | 0.001                        | 0.040 | 0.99    | -0.005            | 0.008 | 0.57    |
| rs1404410  | alpha-tocopherol | 7   | 124248950 | <i>RNU6-102P</i>     | C  | G  | 0.79 | 20.60       | -0.020   | 0.010 | 4.57E-06 | -0.018                       | 0.023 | 0.44    | -0.005            | 0.005 | 0.27    |
| rs1532701  | alpha-tocopherol | 16  | 55698027  | <i>SLC6A2</i>        | A  | G  | 0.55 | 20.85       | 0.010    | 0.000 | 5.07E-06 | 0.015                        | 0.020 | 0.43    | 0.005             | 0.004 | 0.23    |
| rs2074731  | alpha-tocopherol | 22  | 30733914  | <i>SF3A1</i>         | A  | C  | 0.17 | 22.26       | -0.020   | 0.000 | 2.31E-06 | 0.004                        | 0.025 | 0.86    | 0.005             | 0.005 | 0.34    |
| rs261342   | alpha-tocopherol | 15  | 58731153  | <i>LIPC</i>          | C  | G  | 0.79 | 20.86       | -0.020   | 0.000 | 5.41E-06 | 0.010                        | 0.025 | 0.67    | 0.004             | 0.005 | 0.38    |
| rs7238006  | alpha-tocopherol | 18  | 31927898  | <i>RP11-379L18.3</i> | T  | C  | 0.93 | 24.30       | 0.030    | 0.010 | 6.77E-07 | 0.047                        | 0.036 | 0.19    | 0.005             | 0.007 | 0.54    |
| rs7930821  | alpha-tocopherol | 11  | 19142695  | <i>ZDHHC13</i>       | T  | C  | 0.02 | 19.98       | 0.070    | 0.010 | 7.53E-06 | -0.044                       | 0.067 | 0.52    | -0.021            | 0.014 | 0.13    |
| rs10077932 | gamma-tocopherol | 5   | 2450679   | <i>LINC02142</i>     | T  | C  | 0.14 | 21.35       | -0.040   | 0.010 | 4.08E-06 | 0.032                        | 0.029 | 0.26    | 0.013             | 0.005 | 0.01    |
| rs1013104  | gamma-tocopherol | 17  | 12187236  | <i>RP11-471L13.2</i> | T  | C  | 0.44 | 21.16       | -0.020   | 0.000 | 3.83E-06 | 0.008                        | 0.019 | 0.69    | 0.008             | 0.004 | 0.03    |
| rs10466757 | gamma-tocopherol | 12  | 24984990  | <i>BCAT1</i>         | A  | T  | 0.16 | 19.66       | 0.060    | 0.010 | 9.56E-06 | 0.022                        | 0.022 | 0.32    | NA                | NA    | NA      |
| rs10492212 | gamma-tocopherol | 12  | 107296945 | <i>EEF1B2P4</i>      | T  | C  | 0.16 | 19.53       | -0.030   | 0.010 | 8.66E-06 | 0.002                        | 0.025 | 0.94    | 0.002             | 0.005 | 0.77    |
| rs10520845 | gamma-tocopherol | 5   | 16879933  | <i>MYO10</i>         | A  | C  | 0.02 | 20.78       | 0.190    | 0.040 | 5.27E-06 | 0.135                        | 0.077 | 0.08    | -0.001            | 0.017 | 0.97    |
| rs1060467  | gamma-tocopherol | 19  | 16024538  | <i>CYP4F11</i>       | A  | G  | 0.59 | 26.81       | 0.020    | 0.000 | 2.61E-07 | -0.014                       | 0.020 | 0.48    | -0.006            | 0.004 | 0.12    |
| rs13336771 | gamma-tocopherol | 16  | 48318728  | <i>LONP2</i>         | A  | C  | 0.17 | 20.15       | 0.060    | 0.010 | 7.39E-06 | -0.059                       | 0.026 | 0.03    | 0.007             | 0.005 | 0.17    |
| rs261301   | gamma-tocopherol | 15  | 58686939  | <i>ALDH1A2</i>       | T  | C  | 0.13 | 22.56       | 0.030    | 0.010 | 2.06E-06 | 0.050                        | 0.028 | 0.07    | 0.003             | 0.006 | 0.63    |
| rs2794327  | gamma-tocopherol | 1   | 3512341   | <i>MEGF6</i>         | T  | C  | 0.67 | 19.69       | -0.040   | 0.010 | 8.78E-06 | 0.008                        | 0.024 | 0.74    | 0.000             | 0.004 | 0.99    |
| rs5994305  | gamma-tocopherol | 22  | 30820707  | <i>SEC14L2</i>       | A  | G  | 0.83 | 24.52       | 0.030    | 0.010 | 7.15E-07 | 0.002                        | 0.025 | 0.95    | -0.002            | 0.005 | 0.69    |
| rs6821770  | gamma-tocopherol | 4   | 7732805   | <i>SORCS2</i>        | A  | G  | 0.14 | 19.52       | 0.040    | 0.010 | 8.92E-06 | -0.024                       | 0.026 | 0.36    | -0.006            | 0.005 | 0.25    |
| rs7038957  | gamma-tocopherol | 9   | 106539439 | <i>RNA5SP291</i>     | T  | C  | 0.83 | 21.43       | -0.030   | 0.010 | 3.86E-06 | -0.019                       | 0.026 | 0.46    | 0.008             | 0.005 | 0.14    |
| rs7350776  | gamma-tocopherol | 15  | 33689075  | <i>RYR3</i>          | C  | G  | 0.70 | 21.12       | 0.020    | 0.010 | 3.86E-06 | 0.010                        | 0.021 | 0.64    | 0.002             | 0.004 | 0.61    |
| rs11167905 | ascorbate        | 5   | 144906846 | <i>PRELID2</i>       | C  | T  | 0.14 | 24.03       | -0.080   | 0.020 | 9.83E-07 | 0.053                        | 0.028 | 0.06    | -0.001            | 0.005 | 0.87    |

## Online Supporting Material

|             |           |    |           |               |   |   |      |       |        |       |          |        |       |      |        |       |      |
|-------------|-----------|----|-----------|---------------|---|---|------|-------|--------|-------|----------|--------|-------|------|--------|-------|------|
| rs13069990  | ascorbate | 3  | 115620801 | LSAMP         | T | C | 0.62 | 21.16 | -0.050 | 0.010 | 4.44E-06 | -0.017 | 0.020 | 0.40 | -0.002 | 0.004 | 0.62 |
| rs13103690  | ascorbate | 4  | 9972778   | SLC2A9        | G | T | 0.47 | 20.77 | 0.050  | 0.010 | 5.20E-06 | -0.016 | 0.019 | 0.42 | -0.003 | 0.004 | 0.51 |
| rs2070006   | ascorbate | 4  | 155513866 | FGA           | C | T | 0.37 | 20.90 | -0.050 | 0.010 | 4.76E-06 | 0.018  | 0.020 | 0.37 | 0.005  | 0.004 | 0.17 |
| rs577596    | ascorbate | 22 | 25931606  | AL00872.1.1   | A | G | 0.38 | 24.74 | -0.060 | 0.010 | 6.68E-07 | 0.025  | 0.022 | 0.26 | 0.002  | 0.004 | 0.66 |
| rs6713914   | ascorbate | 2  | 59523041  | AC007131.2    | C | T | 0.44 | 26.13 | -0.060 | 0.010 | 3.22E-07 | 0.013  | 0.019 | 0.49 | 0.000  | 0.004 | 0.98 |
| rs6826474   | ascorbate | 4  | 96650120  | MANBA         | T | C | 0.96 | 23.06 | -0.140 | 0.030 | 1.56E-06 | 0.018  | 0.054 | 0.74 | -0.004 | 0.012 | 0.71 |
| rs6834631   | ascorbate | 4  | 122315665 | RP11-170N16.1 | G | T | 0.04 | 23.93 | -0.130 | 0.030 | 1.03E-06 | 0.048  | 0.048 | 0.31 | -0.006 | 0.009 | 0.54 |
| rs7112460   | ascorbate | 11 | 125751859 | HYLS1         | T | C | 0.93 | 23.63 | 0.110  | 0.020 | 1.14E-06 | 0.037  | 0.040 | 0.36 | 0.011  | 0.008 | 0.17 |
| rs8057559   | ascorbate | 16 | 73317172  | RP11-140I24.2 | T | C | 0.96 | 19.74 | 0.140  | 0.030 | 9.10E-06 | -0.043 | 0.065 | 0.51 | 0.002  | 0.012 | 0.85 |
| rs808686    | ascorbate | 20 | 19717135  | AL121761.1    | A | G | 0.49 | 21.83 | 0.060  | 0.010 | 3.01E-06 | 0.019  | 0.020 | 0.36 | -0.002 | 0.004 | 0.64 |
| rs8105491   | ascorbate | 19 | 20403988  | CTC-260E6.6   | T | G | 0.85 | 22.24 | -0.070 | 0.010 | 2.30E-06 | -0.051 | 0.027 | 0.06 | 0.006  | 0.005 | 0.26 |
| rs9419004   | ascorbate | 10 | 134914522 | ADGRA1        | C | G | 0.28 | 20.35 | -0.250 | 0.060 | 6.53E-06 | 0.057  | 0.030 | 0.06 | -0.003 | 0.005 | 0.49 |
| rs9606290   | ascorbate | 22 | 20218237  | MYO18B        | A | G | 0.26 | 20.40 | 0.160  | 0.040 | 6.32E-06 | 0.068  | 0.026 | 0.01 | -0.006 | 0.005 | 0.20 |
| rs10019071  | retinol   | 4  | 181442264 | RN7SKP13      | A | G | 0.01 | 16.72 | 0.660  | 0.160 | 3.64E-06 | 0.149  | 0.104 | 0.15 | -0.004 | 0.015 | 0.77 |
| rs112293959 | retinol   | 15 | 80358561  | ZFAND6        | G | A | 0.99 | 10.88 | -0.430 | 0.130 | 5.70E-06 | 0.091  | 0.061 | 0.13 | 0.006  | 0.011 | 0.57 |
| rs114515641 | retinol   | 3  | 118837344 | IGSF11        | G | T | 0.03 | 10.32 | 0.410  | 0.130 | 7.12E-06 | -0.023 | 0.055 | 0.68 | 0.015  | 0.011 | 0.18 |
| rs1153379   | retinol   | 21 | 16678993  | AP000472.3    | A | G | 0.95 | 14.97 | -0.320 | 0.080 | 6.10E-06 | -0.045 | 0.067 | 0.50 | -0.014 | 0.009 | 0.09 |
| rs1176744   | retinol   | 11 | 113803028 | HTR3B         | C | A | 0.31 | 20.97 | -0.210 | 0.050 | 3.52E-07 | -0.040 | 0.021 | 0.05 | -0.010 | 0.004 | 0.02 |
| rs118025446 | retinol   | 6  | 84904002  | CEP162        | A | G | 0.04 | 17.38 | -0.480 | 0.120 | 9.84E-06 | -0.050 | 0.053 | 0.35 | -0.019 | 0.010 | 0.05 |
| rs12955464  | retinol   | 18 | 10141045  | RP11-419J16.1 | G | C | 0.87 | 14.79 | -0.230 | 0.060 | 3.71E-06 | -0.075 | 0.039 | 0.05 | -0.008 | 0.006 | 0.16 |
| rs139726207 | retinol   | 2  | 223878661 | SERPINE2      | G | A | 0.91 | 11.21 | 0.370  | 0.110 | 4.46E-06 | 0.037  | 0.036 | 0.30 | NA     | NA    | NA   |
| rs149113848 | retinol   | 2  | 81021743  | AC084193.1    | G | C | 0.99 | 13.21 | -0.960 | 0.270 | 3.47E-06 | NA     | NA    | NA   | -0.011 | 0.025 | 0.67 |
| rs149478645 | retinol   | 7  | 117400313 | CTTNBP2       | G | A | 0.97 | 12.79 | -0.510 | 0.140 | 1.30E-06 | 0.064  | 0.088 | 0.47 | -0.022 | 0.014 | 0.11 |
| rs17005512  | retinol   | 4  | 83113756  | RP11-576N17.4 | C | G | 0.17 | 13.33 | -0.220 | 0.060 | 2.77E-06 | 0.010  | 0.021 | 0.63 | -0.004 | 0.005 | 0.51 |
| rs1842947   | retinol   | 17 | 3316976   | OR3A3         | G | A | 0.49 | 20.06 | -0.190 | 0.040 | 8.34E-07 | -0.010 | 0.021 | 0.63 | 0.003  | 0.004 | 0.47 |
| rs2147337   | retinol   | 20 | 1612282   | SIRPG         | G | T | 0.66 | 12.68 | 0.160  | 0.040 | 9.00E-06 | -0.002 | 0.020 | 0.91 | 0.004  | 0.004 | 0.29 |
| rs2367816   | retinol   | 2  | 33873296  | HNRNPA1P61    | G | A | 0.26 | 19.64 | 0.230  | 0.050 | 9.46E-06 | 0.028  | 0.022 | 0.21 | -0.001 | 0.005 | 0.87 |
| rs2417325   | retinol   | 12 | 14171015  | GRIN2B        | T | C | 0.09 | 15.49 | 0.330  | 0.080 | 1.29E-06 | 0.001  | 0.037 | 0.99 | -0.007 | 0.007 | 0.32 |
| rs3890033   | retinol   | 3  | 195591527 | TNK2          | C | T | 0.50 | 11.76 | 0.140  | 0.040 | 8.56E-06 | 0.067  | 0.026 | 0.01 | NA     | NA    | NA   |
| rs3898702   | retinol   | 3  | 8011098   | LMCD1-AS1     | T | C | 0.21 | 16.35 | -0.220 | 0.050 | 3.02E-06 | 0.011  | 0.025 | 0.66 | -0.004 | 0.005 | 0.41 |

## Online Supporting Material

|            |         |    |           |                   |   |   |      |       |        |       |          |        |       |      |        |       |      |
|------------|---------|----|-----------|-------------------|---|---|------|-------|--------|-------|----------|--------|-------|------|--------|-------|------|
| rs4135385  | retinol | 3  | 41279440  | CTNNB1            | G | A | 0.76 | 18.75 | 0.210  | 0.050 | 9.80E-06 | 0.029  | 0.023 | 0.20 | 0.010  | 0.005 | 0.02 |
| rs58411567 | retinol | 12 | 124387574 | DNAH10            | A | G | 0.25 | 15.92 | -0.210 | 0.050 | 3.02E-07 | -0.032 | 0.023 | 0.16 | 0.002  | 0.005 | 0.68 |
| rs6550239  | retinol | 3  | 20001318  | RAB5A             | A | G | 0.73 | 14.51 | -0.180 | 0.050 | 4.40E-06 | 0.026  | 0.023 | 0.24 | -0.006 | 0.005 | 0.19 |
| rs75308833 | retinol | 5  | 34602282  | CTD-<br>2197M16.1 | T | C | 0.97 | 11.27 | -0.490 | 0.150 | 3.51E-06 | -0.028 | 0.067 | 0.68 | -0.005 | 0.012 | 0.69 |
| rs7926028  | retinol | 11 | 50213631  | RP11-<br>347H15.6 | T | G | 0.47 | 10.39 | -0.130 | 0.040 | 2.75E-06 | -0.008 | 0.021 | 0.69 | NA     | NA    | NA   |
| rs945817   | retinol | 6  | 75454012  | RNU6-248P         | A | G | 0.83 | 25.32 | -0.280 | 0.050 | 6.46E-07 | -0.010 | 0.024 | 0.67 | -0.001 | 0.005 | 0.88 |
| rs9586119  | retinol | 13 | 88613487  | TET1P1            | C | T | 0.11 | 18.24 | 0.350  | 0.080 | 3.34E-06 | 0.036  | 0.036 | 0.32 | 0.011  | 0.007 | 0.11 |

**Abbreviations:** Chr, Chromosome; EA, effect allele; EAF, effect allele frequency; NA, not available; OA, other allele; Pos, position; SE, standard error; SNP, single nucleotide polymorphism.

The unit of beta coefficients is log-odds per allele.

## Online Supporting Material

**Supplemental Table S6:** IVW findings and sensitivity analyses for genetically predicted per unit increase in circulating antioxidants and parental lifespan outcome.

| Antioxidants                       | IVW/Wald ratio        |              |                              | Weighted Median       |              | MR-Egger              |            |                        | MR-PRESSO         |                        |              |
|------------------------------------|-----------------------|--------------|------------------------------|-----------------------|--------------|-----------------------|------------|------------------------|-------------------|------------------------|--------------|
|                                    | Beta<br>(95% CI)      | P value      | P value for<br>heterogeneity | Beta<br>(95% CI)      | P value      | Beta<br>(95% CI)      | P<br>value | Intercept<br>(P value) | No. of<br>outlier | Beta<br>(95% CI)       | P<br>value   |
| <b>Absolute circulating levels</b> |                       |              |                              |                       |              |                       |            |                        |                   |                        |              |
| Ascorbate (μmol/L)                 | -0.05<br>(-0.49-0.39) | 0.825        | 0.285                        | 0.10<br>(-0.42-0.61)  | 0.708        | 0.19<br>(-0.51-0.89)  | 0.607      | -0.002<br>(0.409)      | 0                 | -0.050<br>(-0.49-0.39) | 0.830        |
| Lycopene (μg/dL)                   | 0.07<br>(-0.15-0.29)  | 0.521        | 0.114                        | 0.11<br>(-0.11-0.33)  | 0.330        | 1.00<br>(0.95-1.05)   | 0.953      | 0.003<br>(0.689)       | 0                 | 0.07<br>(-0.15-0.29)   | 0.556        |
| Selenium (ln-transformed)          | -0.24<br>(-0.51-0.04) | 0.098        | 0.183                        | -0.23<br>(-0.49-0.02) | 0.075        | -0.21<br>(-1.32-0.91) | 0.751      | -0.000<br>(0.963)      | 0                 | -0.24<br>(-0.51-0.04)  | 0.196        |
| β-carotene (ln-transformed)        | 0.30<br>(-0.06-0.66)  | 0.098        | 0.680                        | 0.29<br>(-0.11-0.68)  | 0.161        | -0.08<br>(-1.43-1.28) | 0.930      | 0.005<br>(0.551)       | NA                | NA                     | NA           |
| Retinol (ln-transformed)           | 0.00<br>(-1.83-1.84)  | 0.997        | 0.347                        | NA                    | NA           | NA                    | NA         | NA                     | NA                | NA                     | NA           |
| <b>Antioxidant metabolites</b>     |                       |              |                              |                       |              |                       |            |                        |                   |                        |              |
| α-tocopherol (log10 units)         | 0.08<br>(-1.29-1.45)  | 0.906        | 0.514                        | 0.83<br>(-1.02-2.67)  | 0.380        | -1.15<br>(-4.05-1.75) | 0.460      | 0.003<br>(0.352)       | 0                 | 0.08<br>(-1.22-1.39)   | 0.904        |
| γ-tocopherol (log10 units)         | -0.62<br>(-1.57-0.34) | 0.205        | 0.102                        | -0.03<br>(-1.11-1.05) | 0.956        | 0.78<br>(-1.09-2.66)  | 0.432      | -0.005<br>(0.128)      | 0                 | -0.62<br>(-1.57-0.34)  | 0.231        |
| Retinol (log10 units)              | 0.17<br>(0.07-0.27)   | <b>0.001</b> | 0.393                        | 0.14<br>(0.00-0.29)   | <b>0.048</b> | 0.13<br>(-0.16-0.42)  | 0.395      | 0.001<br>(0.794)       | 0                 | 0.17<br>(0.07-0.27)    | <b>0.003</b> |
| Ascorbate (log10 units)            | -0.03<br>(-0.27-0.22) | 0.817        | 0.792                        | 0.12<br>(-0.25-0.48)  | 0.533        | 0.18<br>(-0.26-0.62)  | 0.430      | -0.002<br>(0.174)      | 0                 | -0.03<br>(-0.23-0.17)  | 0.782        |

**Abbreviations:** IVW, Inverse-Variance weighted; MR-PRESSO, MR Pleiotropy RESidual Sum and Outlier; NA, not available.

## Online Supporting Material

**Supplemental table S7:** Details of GWAS datasets used to test associations of antioxidant-instrumenting SNPs with potential confounders and other determinants of longevity.

| Trait                           | PMID     | Access in MR-Base | N         | Ethnicity          | Absolute antioxidants SNPs available in datasets |                |          |            |         | Antioxidant metabolites SNPs available in datasets |              |                 |                 |
|---------------------------------|----------|-------------------|-----------|--------------------|--------------------------------------------------|----------------|----------|------------|---------|----------------------------------------------------|--------------|-----------------|-----------------|
|                                 |          |                   |           |                    | ascorbate                                        | Lycopene       | Selenium | β-carotene | retinol | α-tocopherol                                       | γ-tocopherol | Ascorbate       | Retinol         |
| Education <sup>1</sup>          | 27225129 | ieu-a-1001        | 1,196     | European           | 10                                               | 5              | 4        | 3          | 2       | 11                                                 | 13           | 14              | 24              |
| Smoking initiation <sup>2</sup> | 20418890 | ieu-a-962         | 1,232,091 | European           | 6 <sup>3</sup>                                   | 4 <sup>5</sup> | 4        | 3          | 2       | 11                                                 | 13           | 13 <sup>6</sup> | 15 <sup>7</sup> |
| T2DM                            | 22885922 | ieu-a-26          | 898,130   | European           | 5 <sup>4</sup>                                   | 5              | 4        | 3          | 2       | 11                                                 | 13           | 14              | 15 <sup>7</sup> |
| BMI                             | 25673413 | ieu-a-835         | ~700,000  | European           | 6 <sup>3</sup>                                   | 5              | 4        | 3          | 2       | 11                                                 | 13           | 14              | 15 <sup>7</sup> |
| LDL-c                           | 27005778 | met-c-895         | 188,577   | primarily European | 10                                               | 5              | 4        | 3          | 2       | 11                                                 | 13           | 14              | 24              |
| HDL-c                           | 27005778 | met-c-864         | 188,577   | Primarily European | 10                                               | 5              | 4        | 3          | 2       | 11                                                 | 13           | 14              | 24              |
| Hypertension                    | -        | UKB-b:12493       | >1million | European           | 10                                               | 5              | 4        | 3          | 2       | 11                                                 | 13           | 14              | 24              |

<sup>1</sup> Number of years of schooling completed.

<sup>2</sup> Ever vs. never being a regular smoker.

<sup>3</sup> rs10051765, rs117885456, rs2559850, and rs6693447 were missing and no suitable proxy was found in smoking initiation dataset.

<sup>4</sup> rs10051765, rs117885456, rs2559850, rs33972313, and rs6693447 were missing and no suitable proxy was found in smoking initiation dataset.

<sup>5</sup> rs2232315 was missing and no suitable proxy was found in smoking initiation dataset.

<sup>6</sup> rs9419004 was missing and no suitable proxy was found in smoking initiation dataset.

<sup>7</sup> rs112293959, rs114515641, rs1153379, rs12955464, rs149113848, rs149478645, rs3898702, rs58411567, rs75308833 was missing and no suitable proxy was found in these outcome datasets

**Abbreviations:** BMI, body mass index; HDL-c, high-density lipoprotein cholesterol; LDL-c, low-density lipoprotein cholesterol; SNPs, single-nucleotide polymorphisms; T2DM, type 2 diabetes mellitus.

## Online Supporting Material

**Supplemental table S8:** Comparison of the impacts on circulating antioxidant levels between genetic instruments and antioxidant supplementation.

| Antioxidants      | Genetic instruments                                   |                         | Antioxidant supplementation          |                 |
|-------------------|-------------------------------------------------------|-------------------------|--------------------------------------|-----------------|
|                   | Fold or concentration change                          | Expose duration         | Fold or concentration change         | Expose duration |
| Ascorbate         | 1.14-fold in $\mu\text{mol/L}$ <sup>a</sup> [1]       |                         | 1.15-14 fold in $\mu\text{mol/L}$    | 0.23-10.1 years |
| Lycopene          | 0.16 $\mu\text{mol/L}$ <sup>b</sup> [2]               |                         | 0.11-0.57 $\mu\text{mol/L}$          | 2-8 weeks       |
| Selenium          | 0.95-1.03 $\mu\text{g/g}$ per effect allele[3]        | Life-long<br>(presumed) | 0.7-1.6 $\mu\text{mol/L}$            | 0.25-9 years    |
| $\beta$ -carotene | 2.1 to 2.5-fold in $\text{nmol/L}$ <sup>c</sup> [4]   |                         | 0.60 to 10.11-fold in $\text{mg/dL}$ | 0.5-12 years    |
| Retinol           | 1.13 to 1.15-fold in $\mu\text{g/L}$ <sup>d</sup> [5] |                         | 0.86 to 1.06 fold in $\text{ug/L}$   | 0.003-6 years   |

a. Q5 vitamin C-raising genetic risk score compared with Q1.

b. A allele in rs7680948 was related to 8.6  $\text{ug/dL}$  decreased serum lycopene level; for other 4 SNPs included in this MR study (rs4635297, rs341075, rs6108801, rs2232315), the effect of genetic variants on circulating lycopene was not reported in original publication.

c. Based on rs12934922 and rs7501331 only.

d. Two copies of both variant alleles (rs1667255: C/C, and rs10882272: C/C) related to 12.7–15.1% higher circulating retinol level.

## Online Supporting Material

### Reference:

1. Zheng, J.-S.; Luan, J.a.; Sofianopoulou, E.; Imamura, F.; Stewart, I.D.; Day, F.R.; Pietzner, M.; Wheeler, E.; Lotta, L.A.; Gundersen, T.E., et al. Plasma Vitamin C and Type 2 Diabetes: Genome-Wide Association Study and Mendelian Randomization Analysis in European Populations. *Diabetes Care* **2021**, *44*, doi:10.2337/dc20-1328.
2. D'Adamo, C.R.; D'Urso, A.; Ryan, K.A.; Yerges-Armstrong, L.M.; Semba, R.D.; Steinle, N.I.; Mitchell, B.D.; Shuldiner, A.R.; McArdle, P.F. A Common Variant in the SETD7 Gene Predicts Serum Lycopene Concentrations. *Nutrients* **2016**, *8*, 82, doi:10.3390/nu8020082.
3. Cornelis, M.C.; Fornage, M.; Foy, M.; Xun, P.; Gladyshev, V.N.; Morris, S.; Chasman, D.I.; Hu, F.B.; Rimm, E.B.; Kraft, P., et al. Genome-wide association study of selenium concentrations. *Hum Mol Genet* **2015**, *24*, 1469-1477, doi:10.1093/hmg/ddu546.
4. Leung, W.C.; Hessel, S.; Méplan, C.; Flint, J.; Oberhauser, V.; Tourniaire, F.; Hesketh, J.E.; von Lintig, J.; Lietz, G. Two common single nucleotide polymorphisms in the gene encoding  $\beta$ -carotene 15,15'-monooxygenase alter  $\beta$ -carotene metabolism in female volunteers. *FASEB J.* **2009**, *23*, 1041-1053, doi:10.1096/fj.08-121962.
5. Mondul, A.M.; Yu, K.; Wheeler, W.; Zhang, H.; Weinstein, S.J.; Major, J.M.; Cornelis, M.C.; Mannisto, S.; Hazra, A.; Hsing, A.W., et al. Genome-wide association study of circulating retinol levels. *Hum Mol Genet* **2011**, *20*, 4724-4731, doi:10.1093/hmg/ddr387.
